# Supplementary material
Source: publisher figshare collection journal article supplement (https://gsajournals.figshare.com/ndownloader/files/25300469)
Supplement: Supplementary file 1 [file 25300469]

| **TABLE S2. GENOTYPES IN FIGURES** | |
| --- | --- |
|  |  |
| **Figure** | **Genotype** |
| Fig. 1A, A’ | *yw hsflp122/w;; tub>myc, y+STOP>Gal4, UAS-GFP/TM6B* |
| Fig. 1B, B’ | *yw hsflp122/w; egr3/ egr3; tub>myc, y+STOP>Gal4, UAS-GFP/TM6B* |
| Fig. 1D, D’ | *yw hsflp122/w;; act>CD2STOP>Gal4, UAS-GFP/UAS-Myc* |
| Fig. 1E, E’ | *yw hsflp122/w; egr3/ egr3; act>CD2STOP>Gal4, UAS-GFP/UAS-Myc* |
| Fig. 2A | *yw hsflp122; HmlΔ-DsRednls* |
| Fig. 2B | *yw hsflp122* |
| Fig. 2C | *w; egr3/ egr3* |
| Fig. 2D | *OreR* |
| Fig. 2E | *w; egr1/egr3* |
| Fig. 2F | *w; egr31/ egr31* |
| Fig. 2G | *w; egr3AG/egr3AG* |
| Fig. 3D | Left to right: *OreR, w; egr1/ egr1, w; egr31/ egr31, w; egrRegg1/egrRegg1* |
|  |  |
